# Supplementary material for: Hybrid 1D/3D-Structured Perovskite as a Highly Selective and Stable Sensor for NO2 Detection at Room Temperature
Source: MDPI journal article supplement (doi:10.3390/molecules28062615), 2023-03-13
Supplement: s1 [file s1]

## Supplementary Materials

### Hybrid 1D/3D-Structured Perovskite as a Highly Selective and Stable Sensor for NO<sub>2</sub> Detection at Room Temperature

Anqi Cheng, Jinru Zhao, Xi-Ao Wang, Zhen Lu, Yan Qi \* and Jiankun Sun \*

College of Chemistry and Chemical Engineering, Qingdao University, Qingdao 266071, China;

\* Correspondence: qddxqy@qdu.edu.cn (Y.Q.); sunjk@qdu.edu.cn (J.S.)

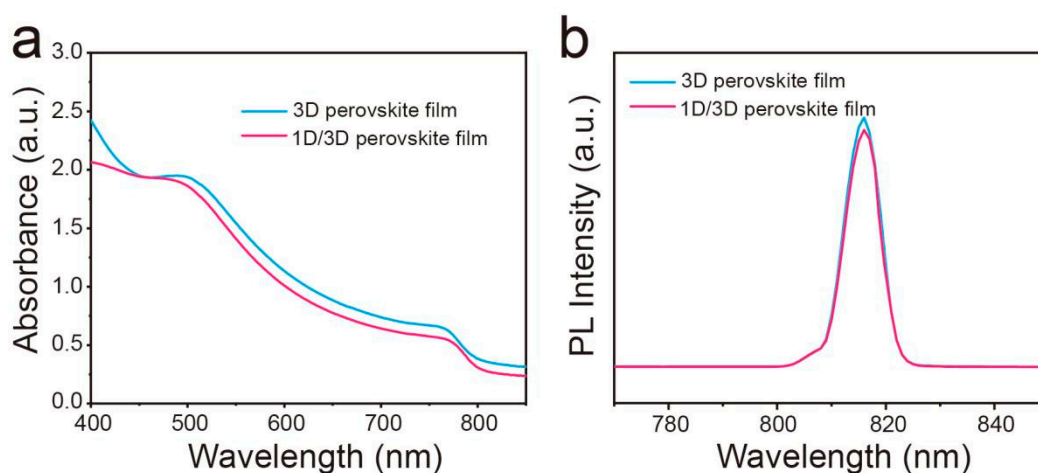

**Figure S1.** (a) UV and (b) PL images of 3D FACs and 1D/3D PyPbI<sub>3</sub>/FACs hybrid-structured perovskite film.

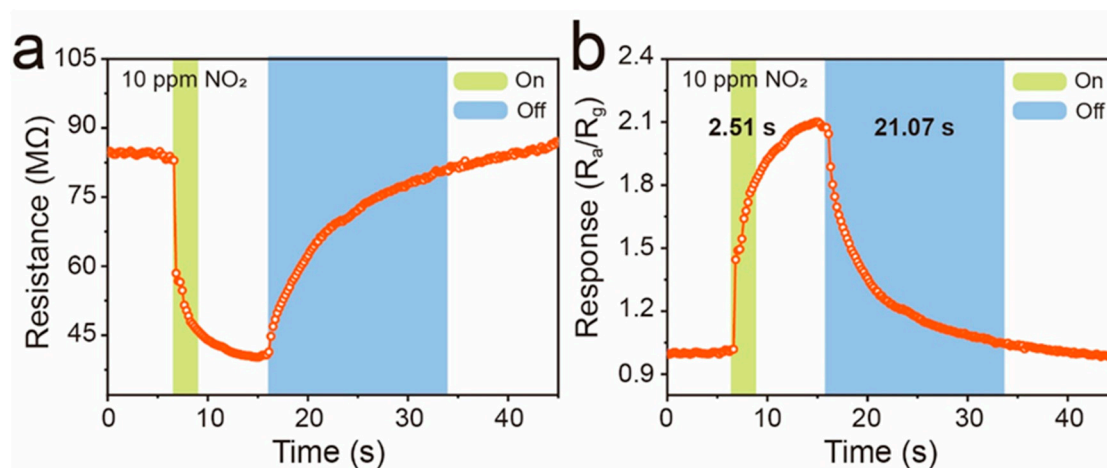

**Figure S2.** The transient (a) resistance and (b) response of the 3D FACs perovskite-based sensor toward 10 ppm NO<sub>2</sub>.

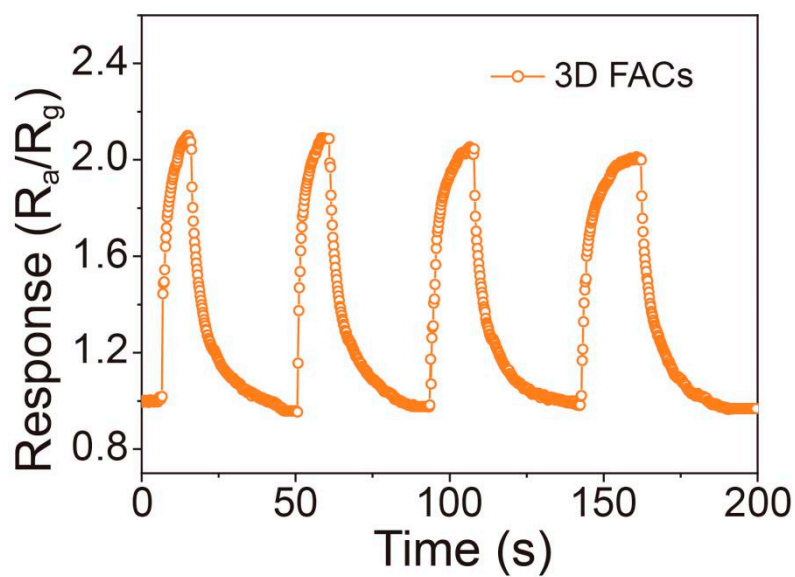

**Figure S3.** The reversibility of 3D FACs perovskite-based sensor toward 10 ppm NO<sub>2</sub>.

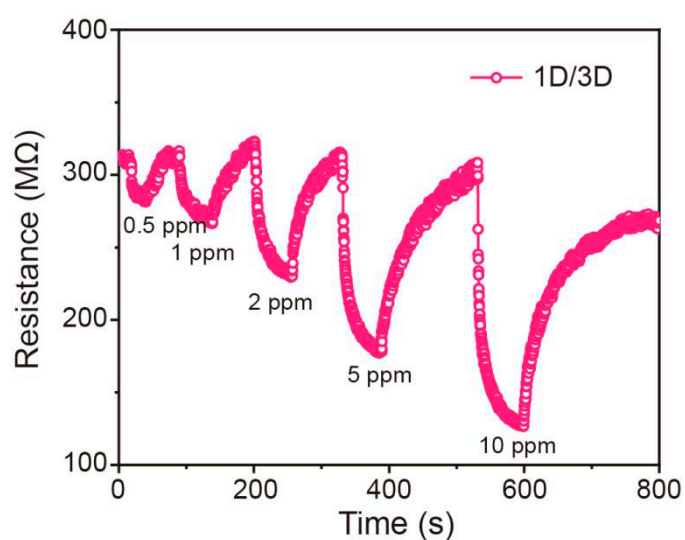

**Figure S4.** The dynamic resistance variation of the 1D/3D PyPbI<sub>3</sub>/FACs hybrid-structured perovskite-based sensor towards different concentrations of NO<sub>2</sub> gas.

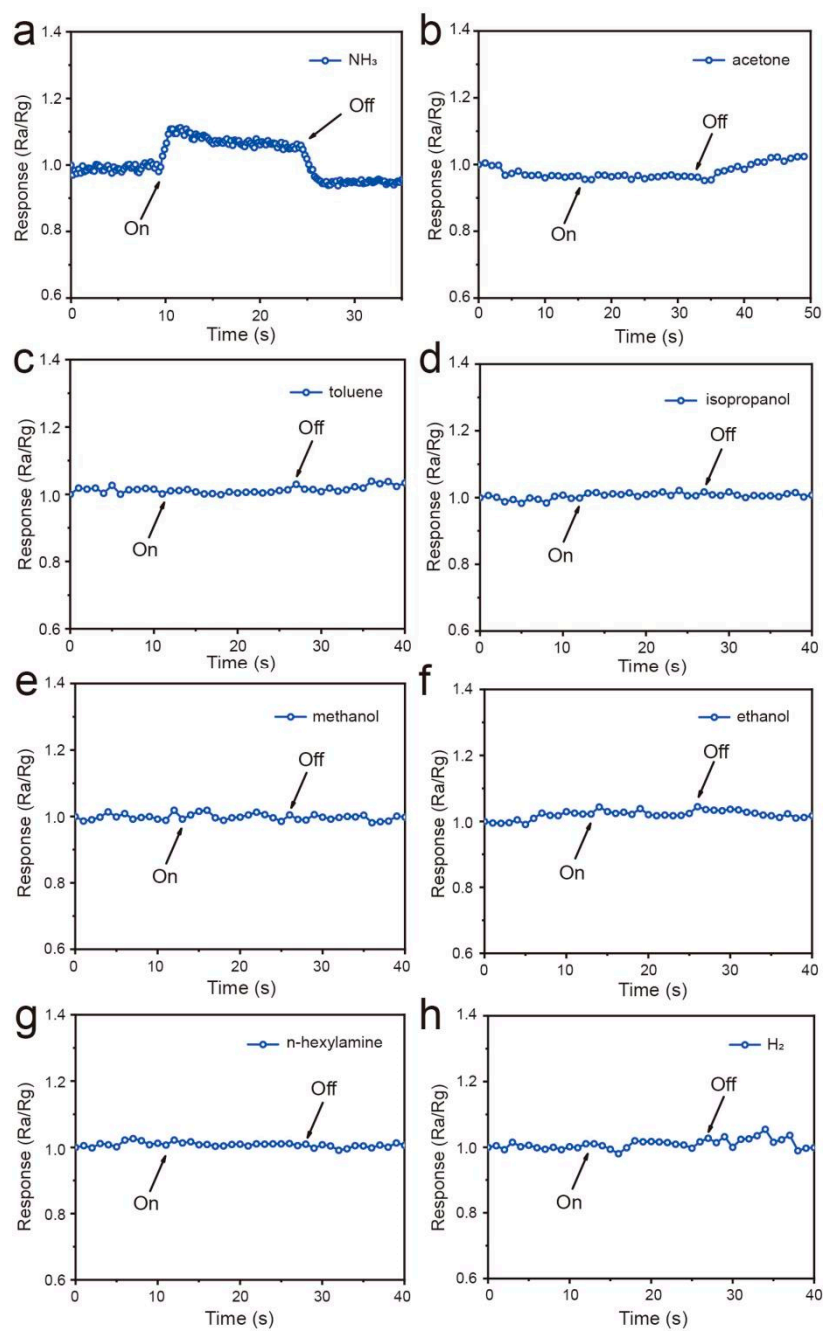

**Figure S5.** The response of PyPbI<sub>3</sub>/FACs hybrid-structured perovskite sensor toward different gases with 10 ppm (a–h).

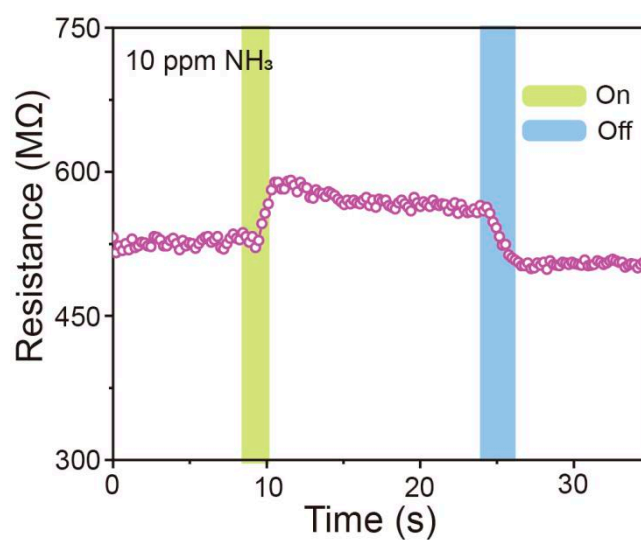

**Figure S6.** The transient resistance of 1D/3D PyPbI<sub>3</sub>/FACs hybrid-structured perovskite-based sensor toward 10 ppm NH<sub>3</sub>.

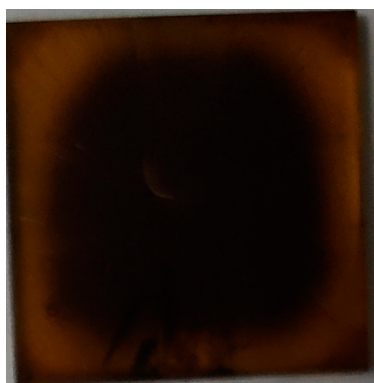

**Figure S7.** Photograph of 3D FACs film record at 3rd day after exposure in high humidity conditions.

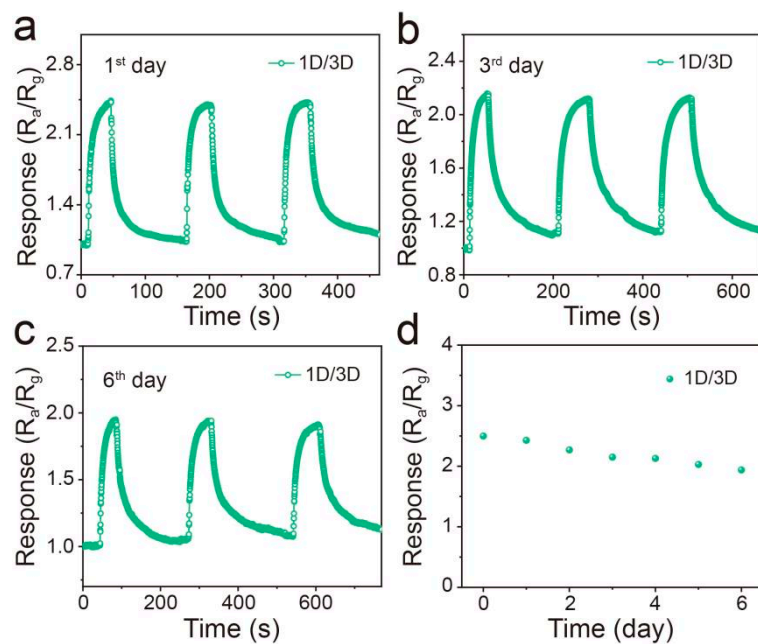

**Figure S8.** Long-term stability of 1D/3D hybrid-structured PyPbI<sub>3</sub>/FACs and 3D FACs perovskite-based sensor toward 10 ppm NO<sub>2</sub> recorded at the 1st (a), 3rd (b) and 6th day (c). (d) The time-dependent response values for 6 successive days in an RH of 70 ± 1% conditions.
